# Supplementary material
Source: MDPI journal article supplement (https://www.mdpi.com/2076-3417/13/19/10879)
Supplement: s1 [file s1]

**Table S1.** Correlations and descriptions of kinetic and physiological variables depending on the interaction of test intensity (100, 80, 60 and 50 % of Maximal Velocity) and menstrual phase (Bleeding, Follicular, Luteal).

| Variables                 | R or Rho with Vmax. | Rho or Tau with mean FC | Intensity 50 % Vmax. |             |             | Intensity 60 % Vmax. |            |            | Intensity 80 % Vmax. |            |            | Intensity 100 % Vmax. |             |             |
|---------------------------|---------------------|-------------------------|----------------------|-------------|-------------|----------------------|------------|------------|----------------------|------------|------------|-----------------------|-------------|-------------|
|                           |                     |                         | Bleed                | Follic      | Lutea       | Bleed                | Follic     | Lutea      | Bleed                | Follic     | Lutea      | Bleed                 | Follic      | Luteal      |
|                           |                     |                         | M (DT)               | M (DT)      | M (DT)      | M (DT)               | M (DT)     | M (DT)     | M (DT)               | M (DT)     | M (DT)     | M (DT)                | M (DT)      | M (DT)      |
| Kinetics                  |                     |                         |                      |             |             |                      |            |            |                      |            |            |                       |             |             |
| Shock (G)                 | .379**              | .103                    | 11.68(2 )            | 10.01(3 .1) | 10.01(3 .1) | 12.02(1.8)           | 11.31(2.4) | 11.29(2.3) | 13.49(1.7)           | 13.45(2.3) | 13.05(2.3) | 11.84(1.4)            | 12.01(1.9)  | 11.85(1.8)  |
| Braking (G)               | .422**              | -.027                   | 8.98(2.7)            | 8.2(3.2)    | 8.31(3.3)   | 9.34(2.7)            | 8.8(3)     | 8.88(3)    | 9.58(2.55)           | 9.91(2.3)  | 10.08(2.1) | 9.3(2)                | 9.82(2.1)   | 9.49(2)     |
| Peak Vertical GRF (F(Bw)) | .560**              | .394***                 | 2.68(0.59)           | 2.39(0.8)   | 2.53(0.7)   | 2.88(0.6)            | 2.93(0.5)  | 2.94(0.5)  | 3.38(0.7)            | 3.44(0.6)  | 3.43(0.6)  | 3.2(0.7)              | 3.16(0.6)   | 3.06(0.7)   |
| V GRF Rate (N/kg/s)       | .694**              | .509***                 | 30.7(3.4)            | 29.4(5.9)   | 29.6(5.5)   | 33.06(4.1)           | 33.78(3.4) | 33.15(3.6) | 37.92(4.5)           | 38.84(3.8) | 38.24(3.9) | 36.6(4.6)             | 36.39(3.5)  | 34.95(4.4)  |
| Power (w)                 | .649**              | .413***                 | 176.9(9.9)           | 179.7(14.5) | 160.9(21.1) | 195.3(6.1)           | 199.1(6)   | 191.7(8.1) | 223.4(6.6)           | 235(5.8)   | 227.1(7.1) | 206(15.7)             | 221.3(4.6)  | 215.1(17.5) |
| H GRF Rate (N/kg/s)       | .703**              | .318***                 | 4.91(0.41)           | 4.96(0.54)  | 4.73(0.33)  | 5.41(0.42)           | 5.58(0.36) | 5.31(0.36) | 7.05(0.51)           | 7.40(0.43) | 7.3(0.5)   | 9.8(3.1)              | 6.63(0.33)  | 8.05(1.13)  |
| Swing Force Rate (N/kg/s) | .671***             | .302***                 | 0.99(0.04)           | 1.04(0.06)  | 0.93(0.07)  | 1.01(0.06)           | 1.05(0.04) | 0.98(0.06) | 1.25(0.06)           | 1.34(0.05) | 1.29(0.06) | 1.56(0.34)            | 1.25(0.04)  | 1.46(0.18)  |
| Total Force Rate (N/kg/s) | .790**              | .390***                 | 79.9(3.2)            | 79.9(5.3)   | 76.3(4)     | 84.8(3.7)            | 87.6(2.6)  | 83.7(3.2)  | 103.9(4.4)           | 109.1(3.6) | 106(4.2)   | 123.7(2.3)            | 100(2.4)    | 111.3(10)   |
| V Spring Stiffness (KN/m) | .030                | -.169                   | 29.33(20.2)          | 44.01(48.5) | 25.73(20.9) | 17.76(6.6)           | 16.36(3.3) | 15.7(3.3)  | 16.98(1.6)           | 17.34(1.4) | 16.94(1.8) | 21.45(7)              | 27.86(18.9) | 23.13(8.4)  |
| Physiological             | R or Rho with Vmax. | Rho or Tau with mean FC | Intensity 50 % Vmax. |             |             | Intensity 60 % Vmax. |            |            | Intensity 80 % Vmax. |            |            | Intensity 100 % Vmax. |             |             |
|                           |                     |                         | Bleed                | Follic      | Lutea       | Bleed                | Follic     | Lutea      | Bleed                | Follic     | Lutea      | Bleed                 | Follic      | Luteal      |

| HR_max (bpm)           | .691***       | .881***                 | 129.9(3<br>.7)       | 144.9(6<br>.8) | 127(3.5<br>)   | 144.2(5.5)           | 147.4(5.1) | 144.7(6.2) | 167(4.5)             | 169.6(4.4) | 167.4(4.7) | 176.4(3.1)            | 177.4(4.3) | 178.7(3.7)   |
|------------------------|---------------|-------------------------|----------------------|----------------|----------------|----------------------|------------|------------|----------------------|------------|------------|-----------------------|------------|--------------|
| HR_mean (bpm)          | .516***       | 1                       | 121.7(2<br>.7)       | 133.1(4<br>.8) | 120.4(3<br>.2) | 137.1(4.4)           | 139.4(4.8) | 137.7(5.8) | 158.4(4.8)           | 161.9(4.4) | 158.6(4.9) | 146.4(3.8)            | 148.1(3.7) | 149(4.1<br>) |
| HR_min (bpm)           | .049          | .520***                 | 104.7(3<br>.7)       | 104.8(2<br>.4) | 100.3(2<br>.9) | 102.6(5.4)           | 108.6(5.3) | 101.7(7.8) | 111.3(6.6)           | 123.1(3.8) | 109.3(8.1) | 98(6.7)               | 101.3(3.4) | 105.8(4.8)   |
| Final_lactate (mmol/l) | .680***       | .607***                 | 1.35(0.24)           | 1.08(0.32)     | 1.38(0.25)     | 1.03(0.16)           | 1.13(0.35) | 1.32(0.33) | 2.42(0.29)           | 4.08(1.08) | 4.15(1.22) | 5.15(2.07)            | 6.1(0.88)  | 5.4(0.87)    |
| Perceived effort       | Rho with Vmax | Rho or Tau with mean FC | Intensity 50 % Vmax. |                |                | Intensity 60 % Vmax. |            |            | Intensity 80 % Vmax. |            |            | Intensity 100 % Vmax. |            |              |
|                        |               |                         | Bleed                | Follic         | Lutea          | Bleed                | Follic     | Lutea      | Bleed                | Follic     | Lutea      | Bleed                 | Follic     | Luteal       |
| Before the test        | -.017         | -.254**                 | DNR                  | DNR            | DNR            | DNR                  | DNR        | DNR        | 3(1.7)               | 1.5(1.2)   | 1.75(1.6)  | 1.63(1.3)             | 1(1.3)     | 1.5(1.3)     |
| During the test        | .274**        | -.028                   | DNR                  | DNR            | DNR            | DNR                  | DNR        | DNR        | 3(0.6)               | 2.25(0.2)  | 2.25(0.5)  | 3.37(0.4)             | 2.75(0.5)  | 2.25(0.6)    |
| After the test         | .354***       | .140                    | DNR                  | DNR            | DNR            | DNR                  | DNR        | DNR        | 3.25(0.5)            | 2.5(0.4)   | 2.6(0.4)   | 3.75(0.5)             | 4(0.4)     | 3.6(0.4)     |

Bleed = Bleeding phase; Follic= Follicular phase; Lutea= Luteal phase; DNR= Data Not Registered; V = Vertical; H = Horizontal; N= Newton; Kg= Kilogram; m= metre; G= Gravity; w= Watts; bpm = beats/minute; HR= heart rate. V max = maximum test speed; V average = average test speed; mmol/L = one thousandth of a mole/litre; \*\*\*=p<.001; \*\*=p<.01.
